# Supplementary material
Source: PubMed Central journal article supplement (PMC10814540)
Supplement: JFM787910_supplementary_material.pdf [file JFM787910_supplementary_material.pdf]

[Start Over](#)

**NOTE:**

**USE THIS PAGE FOR A GENERAL OVERVIEW OF THE SURVEY AND/OR TO PRINT A COPY OF THE SURVEY. YOU CAN NOT TAKE A SURVEY FROM THIS PAGE.**

**To take this survey go here: <http://www.vin.com/Members/Detour/Survey.plx?TestID=3398>**

**Pharmaceutical approaches to treating chronic musculoskeletal pain in cats > TestID=3398**

Created: 10/12/2016 2:21:00 PM

[Print Page](#)

**Introduction**

Do you ever see cats with chronic musculoskeletal pain (osteoarthritis etc)? What do you do for these cats? Drs Derek Adrian and Duncan Lascelles, of North Carolina State University, would like you to share your thoughts and experience in dealing with these cats. The investigators are NOT involved with the pharmaceutical industry, but want to study treatment of musculoskeletal pain in cats. The survey is extensive, but most participants should be able to complete it in LESS THAN 10 minutes. All responses will be confidential and only summary data will be presented or published. All participants will be invited to view the preliminary results for a limited time once the survey has ended. If you have any questions about the survey, please email A href="mailto:mrishniw@vin.com"Mark RishniwA.

**Question 1. Approximately how often do you see cats with suspected chronic musculoskeletal pain/arthritis, whether based on patient history, exam, or radiographic findings?**

**Radio Answer**

Select one answer.

- a.  Daily
- b.  I don't deal with feline patients
- c.  Monthly
- d.  Never
- e.  Quarterly
- f.  Weekly
- g.  Yearly

---

## Page 2

### Question 2. How often do you recommend therapy for these cats?

#### Radio Answer

Select one answer.

- a.  100% of the time
- b.  Between 0% and 25% of the time
- c.  Between 25% and 50% of the time
- d.  Between 50% and 75% of the time
- e.  Between 75% and 100% of the time
- f.  Never

---

## Page 3

### Question 3. How frequently do clients elect to administer the recommended treatments?

#### Radio Answer

Select one answer.

- a.  100% of the time
- b.  Between 0% and 25% of the time
- c.  Between 25% and 50% of the time
- d.  Between 50% and 75% of the time
- e.  Between 75% and 100% of the time
- f.  Never

---

## Page 4

### Question 4. How long have you been in clinical practice?

#### Radio Answer

Select one answer.

- a.  1 to 5 years
- b.  10 to 20 years
- c.  6 to 10 years
- d.  I am a student
- e.  I am not in clinical practice
- f.  Less than 1 year
- g.  More than 20 years

---

## Page 5

### Question 5. What types of animals do you see within your practice?

#### Checkbox Answer

Select all that apply.

- a.  Cats
- b.  Dogs
- c.  Horses
- d.  Non-equine farm animals
- e.  Non-mammalian companion animals
- f.  Other
- g.  Small mammals

#### Alternate Answer for Question 5

If other, please specify.

Enter Text

### Question 6. Approximately what percentage of your patients are cats?

#### Radio Answer

Select one answer.

- a.  100% (feline only)
- b.  25% to 50%
- c.  51 to 75%
- d.  76% to 99%
- e.  Less than 25%

---

## Page 7

**Question 7. For the drugs that you prescribe for chronic musculoskeletal pain or arthritis, how do you calculate your dosing?**

**Radio Answer**

Select one answer.

- a.  Actual or lean bodyweight - it depends on the drug
- b.  Always based on actual bodyweight
- c.  Always based on lean bodyweight
- d.  Other

**Alternate Answer for Question 7**

If other, please specify.

Enter Text

---

## Page 8

**Question 8. Do you ever prescribe meloxicam for cats with chronic musculoskeletal pain or arthritis?**

**Radio Answer**

Select one answer.

- a.  No
- b.  Yes

---

## Page 9

### Question 9. What is your typical prescribed maintenance dose (per administration)?

#### Radio Answer

Select one answer.

- a.  Between 0.02 mg/kg and 0.04 mg/kg
- b.  Between 0.041 mg/kg and 0.06 mg/kg
- c.  Between 0.061 mg/kg and 0.08 mg/kg
- d.  Between 0.081 mg/kg and 0.1 mg/kg
- e.  Less than 0.02 mg/kg
- f.  More than 0.1 mg/kg

### Question 10. What is your typical dosing frequency?

#### Radio Answer

Select one answer.

- a.  As required (PRN)
- b.  Other
- c.  q 12 hours
- d.  q 24 hours
- e.  q 48 hours
- f.  q 72 hours

#### Alternate Answer for Question 10

If other, please specify.

Enter Text

### Question 11. What is your preferred formulation?

#### Radio Answer

Select one answer.

- a.  Compounded
- b.  Liquid
- c.  Tablet

#### Alternate Answer for Question 11

If compounded, please describe.

Enter Text

### Question 12. To what percentage of your cats with chronic musculoskeletal pain or arthritis do you prescribe this drug?

#### Radio Answer

Select one answer.

- a.  26% to 50%
- b.  51% to 75%
- c.  76% to 99%
- d.  All cats
- e.  Less than 25%

**Question 13. What is the average prescribed duration of treatment with this drug?**

**Radio Answer**

Select one answer.

- a.  11 to 14 days
- b.  15 to 30 days
- c.  2 to 3 days
- d.  31 to 60 days
- e.  4 to 7 days
- f.  61 to 120 days
- g.  8 to 10 days
- h.  More than 120 days
- i.  ONE day

---

## Page 10

**Question 14. Do you ever prescribe robenacoxib (Onsior) for cats with chronic musculoskeletal pain or arthritis?**

**Radio Answer**

Select one answer.

- a.  No
- b.  Yes

---

## Page 11

### Question 15. What is your typical prescribed maintenance dose (per administration)?

#### Radio Answer

Select one answer.

- a.  Between 1 mg/kg and 2.4 mg/kg
- b.  Less than 1 mg/kg
- c.  More than 2.4 mg/kg

### Question 16. What is your typical dosing frequency?

#### Radio Answer

Select one answer.

- a.  As required (PRN)
- b.  Other
- c.  q 12 hours
- d.  q 24 hours
- e.  q 48 hours
- f.  q 72 hours

#### Alternate Answer for Question 16

If other, please specify.

Enter Text

### Question 17. What is your preferred formulation?

#### Radio Answer

Select one answer.

- a.  Compounded
- b.  Tablet

#### Alternate Answer for Question 17

If compounded, please describe.

Enter Text

### Question 18. To what percentage of your cats with chronic musculoskeletal pain or arthritis do you prescribe this drug?

#### Radio Answer

Select one answer.

- a.  26% to 50%
- b.  51% to 75%
- c.  76% to 99%
- d.  All cats

e.  Less than 25%

**Question 19. What is the average prescribed duration of treatment with this drug?**

**Radio Answer**

Select one answer.

- a.  11 to 14 days
- b.  15 to 30 days
- c.  2 to 3 days
- d.  31 to 60 days
- e.  4 to 7 days
- f.  61 to 120 days
- g.  8 to 10 days
- h.  More than 120 days
- i.  ONE day

---

## Page 12

**Question 20. Do you ever prescribe other NSAIDs for cats with chronic musculoskeletal pain or arthritis?**

**Radio Answer**

Select one answer.

- a.  No
- b.  Yes

---

## Page 13

**Question 21. What is your MOST PREFERRED other NSAID that you prescribe?**

**Text Answer**

Type in answer.

---

## Page 14

### Question 22. What is your typical prescribed maintenance dose (per administration)?

**Text Answer**

Type in answer.

### Question 23. What is your typical dosing frequency?

**Radio Answer**

Select one answer.

- a.  As required (PRN)
- b.  Other
- c.  q 12 hours
- d.  q 24 hours
- e.  q 48 hours
- f.  q 72 hours

#### Alternate Answer for Question 23

If other, please specify.

Enter Text

### Question 24. What is your preferred formulation?

**Radio Answer**

Select one answer.

- a.  Compounded
- b.  Liquid
- c.  Tablet

#### Alternate Answer for Question 24

If compounded, please describe.

Enter Text

### Question 25. To what percentage of your cats with chronic musculoskeletal pain or arthritis do you prescribe this drug?

**Radio Answer**

Select one answer.

- a.  26% to 50%
- b.  51% to 75%
- c.  76% to 99%
- d.  All cats

e.  Less than 25%

**Question 26. What is the average prescribed duration of treatment with this drug?**

**Radio Answer**

Select one answer.

- a.  11 to 14 days
- b.  15 to 30 days
- c.  2 to 3 days
- d.  31 to 60 days
- e.  4 to 7 days
- f.  61 to 120 days
- g.  8 to 10 days
- h.  More than 120 days
- i.  ONE day

---

## Page 15

**Question 27. Do you ever prescribe gabapentin (Neurontin) for cats with chronic musculoskeletal pain or arthritis?**

**Radio Answer**

Select one answer.

- a.  No
- b.  Yes

---

## Page 16

### Question 28. What is your typical prescribed maintenance dose (per administration)?

#### Radio Answer

Select one answer.

- a.  Between 1 mg/kg and 5 mg/kg
- b.  Between 10.1 and 15 mg/kg
- c.  Between 15.1 and 20 mg/kg
- d.  Between 5.1 and 10 mg/kg
- e.  Less than 1 mg/kg
- f.  More than 20 mg/kg

### Question 29. What is your typical dosing frequency?

#### Radio Answer

Select one answer.

- a.  As required (PRN)
- b.  Other
- c.  q 12 hours
- d.  q 24 hours
- e.  q 48 hours
- f.  q 72 hours

#### Alternate Answer for Question 29

If other, please specify.

Enter Text

### Question 30. What is your preferred formulation?

#### Radio Answer

Select one answer.

- a.  Capsule
- b.  Compounded
- c.  Liquid

#### Alternate Answer for Question 30

If compounded, please describe.

Enter Text

### Question 31. To what percentage of your cats with chronic musculoskeletal pain or arthritis do you prescribe this drug?

#### Radio Answer

Select one answer.

- a.  26% to 50%
- b.  51% to 75%
- c.  76% to 99%
- d.  All cats
- e.  Less than 25%

**Question 32. What is the average prescribed duration of treatment with this drug?**

**Radio Answer**

Select one answer.

- a.  11 to 14 days
- b.  15 to 30 days
- c.  2 to 3 days
- d.  31 to 60 days
- e.  4 to 7 days
- f.  61 to 120 days
- g.  8 to 10 days
- h.  More than 120 days
- i.  ONE day

---

## Page 17

**Question 33. Do you ever prescribe polysulfated glycosaminoglycans (Adequan) for cats with chronic musculoskeletal pain or arthritis?**

**Radio Answer**

Select one answer.

- a.  No
- b.  Yes

**Question 34. What is your typical prescribed maintenance dose (per administration)?**

**Radio Answer**

Select one answer.

- a.  Approximately 5 mg/kg
- b.  Less than 5 mg/kg
- c.  More than 5 mg/kg

**Question 35. What is your typical dosing frequency?**

**Radio Answer**

Select one answer.

- a.  Daily
- b.  Every 2 weeks
- c.  Monthly
- d.  Other
- e.  Twice weekly
- f.  Weekly

**Alternate Answer for Question 35**

If other, please specify.

Enter Text

**Question 36. To what percentage of your cats with chronic musculoskeletal pain or arthritis do you prescribe this drug?**

**Radio Answer**

Select one answer.

- a.  26% to 50%
- b.  51% to 75%
- c.  76% to 99%
- d.  All cats
- e.  Less than 25%

**Question 37. What is the average prescribed duration of treatment with this drug?**

**Radio Answer**

Select one answer.

- a.  11 to 14 days
- b.  15 to 30 days
- c.  2 to 3 days
- d.  31 to 60 days
- e.  4 to 7 days

- f.  61 to 120 days
- g.  8 to 10 days
- h.  More than 120 days
- i.  ONE day

---

## Page 19

**Question 38. Do you ever prescribe Fish Oil for cats with chronic musculoskeletal pain or arthritis?**

**Radio Answer**

Select one answer.

- a.  No
- b.  Yes

---

## Page 20

### Question 39. What is your typical prescribed maintenance dose (total omega-3 fatty acids per administration)?

#### Radio Answer

Select one answer.

- a.  Between 100.1 and 200 mg/kg
- b.  Between 200.1 and 400 mg/kg
- c.  Between 25 and 50 mg/kg
- d.  Between 50.1 and 100 mg/kg
- e.  Less than 25 mg/kg
- f.  More than 400 mg/kg

### Question 40. What is your typical dosing frequency?

#### Radio Answer

Select one answer.

- a.  As required (PRN)
- b.  Other
- c.  q 12 hours
- d.  q 24 hours
- e.  q 48 hours
- f.  q 72 hours

#### Alternate Answer for Question 40

If other, please specify.

Enter Text

### Question 41. What is your preferred formulation?

#### Radio Answer

Select one answer.

- a.  Capsule
- b.  Liquid

#### Alternate Answer for Question 41

Please specify the brand of liquid or capsule you prefer to prescribe

Enter Text

### Question 42. To what percentage of your cats with chronic musculoskeletal pain or arthritis do you prescribe this drug?

#### Radio Answer

Select one answer.

- a.  26% to 50%

- b.  51% to 75%
- c.  76% to 99%
- d.  All cats
- e.  Less than 25%

**Question 43. What is the average prescribed duration of treatment with this drug?**

**Radio Answer**

Select one answer.

- a.  11 to 14 days
- b.  15 to 30 days
- c.  2 to 3 days
- d.  31 to 60 days
- e.  4 to 7 days
- f.  61 to 120 days
- g.  8 to 10 days
- h.  More than 120 days
- i.  ONE day

---

## Page 21

**Question 44. Do you ever prescribe Joint Support Diets for cats with chronic musculoskeletal pain or arthritis?**

**Radio Answer**

Select one answer.

- a.  No
- b.  Yes

---

## Page 22

**Question 45. What is your MOST PREFERRED Joint Support Diet that you prescribe?**

**Text Answer**

Type in answer.

**Question 46. To what percentage of your cats with chronic musculoskeletal pain or arthritis do you prescribe this diet?**

**Radio Answer**

Select one answer.

- a.  26% to 50%
- b.  51% to 75%
- c.  76% to 99%
- d.  All cats
- e.  Less than 25%

**Question 47. What is the average prescribed duration of treatment with this diet?**

**Radio Answer**

Select one answer.

- a.  11 to 14 days
- b.  15 to 30 days
- c.  2 to 3 days
- d.  31 to 60 days
- e.  4 to 7 days
- f.  61 to 120 days
- g.  8 to 10 days
- h.  More than 120 days
- i.  ONE day

---

## Page 23

**Question 48. Do you ever prescribe other joint supplements, nutraceuticals or dietary supplements (excluding prescription diets) for cats with chronic musculoskeletal pain or arthritis?**

**Radio Answer**

Select one answer.

- a.  No
- b.  Yes

---

## Page 24

**Question 49. What is your MOST PREFERRED other joint supplement, nutraceutical or dietary supplement that you prescribe?**

**Text Answer**

Type in answer.

---

## Page 25

### Question 50. What is your typical prescribed maintenance dose (per administration)?

**Text Answer**

Type in answer.

### Question 51. What is your typical dosing frequency?

**Radio Answer**

Select one answer.

- a.  Daily
- b.  Every 2 weeks
- c.  Monthly
- d.  Other
- e.  Twice weekly
- f.  Weekly

**Alternate Answer for Question 51**

If other, please specify.

Enter Text

### Question 52. What is your preferred formulation?

**Radio Answer**

Select one answer.

- a.  Capsule or tablet
- b.  Compounded
- c.  Liquid

**Alternate Answer for Question 52**

If compounded, please describe.

Enter Text

### Question 53. To what percentage of your cats with chronic musculoskeletal pain or arthritis do you prescribe this drug?

**Radio Answer**

Select one answer.

- a.  26% to 50%
- b.  51% to 75%
- c.  76% to 99%
- d.  All cats

e.  Less than 25%

**Question 54. What is the average prescribed duration of treatment with this drug?**

**Radio Answer**

Select one answer.

- a.  11 to 14 days
- b.  15 to 30 days
- c.  2 to 3 days
- d.  31 to 60 days
- e.  4 to 7 days
- f.  61 to 120 days
- g.  8 to 10 days
- h.  More than 120 days
- i.  ONE day

---

## Page 26

**Question 55. Do you ever prescribe tramadol (Ultram) for cats with chronic musculoskeletal pain or arthritis?**

**Radio Answer**

Select one answer.

- a.  No
- b.  Yes

---

## Page 27

### Question 56. What is your typical prescribed maintenance dose (per administration)?

#### Radio Answer

Select one answer.

- a.  2 to 4 mg/kg
- b.  Less than 2 mg/kg
- c.  More than 4 mg/kg

### Question 57. What is your typical dosing frequency?

#### Radio Answer

Select one answer.

- a.  q 8 hours
- b.  q 12 hours
- c.  q 24 hours
- d.  q 48 hours
- e.  q 72 hours
- f.  As required (PRN)
- g.  Other

#### Alternate Answer for Question 57

If other, please specify.

Enter Text

### Question 58. What is your preferred formulation?

#### Radio Answer

Select one answer.

- a.  Capsule
- b.  Compounded
- c.  Liquid
- d.  Tablet

### Question 59. To what percentage of your cats with chronic musculoskeletal pain or arthritis do you prescribe this drug?

#### Radio Answer

Select one answer.

- a.  26% to 50%
- b.  51% to 75%
- c.  76% to 99%
- d.  All cats
- e.  Less than 25%

**Question 60. What is the average prescribed duration of treatment with this drug?**

**Radio Answer**

Select one answer.

- a.  11 to 14 days
- b.  15 to 30 days
- c.  2 to 3 days
- d.  31 to 60 days
- e.  4 to 7 days
- f.  61 to 120 days
- g.  8 to 10 days
- h.  More than 120 days
- i.  ONE day

---

## Page 28

**Question 61. Do you ever prescribe opioids for cats with chronic musculoskeletal pain or arthritis?**

**Radio Answer**

Select one answer.

- a.  No
- b.  Yes

---

## Page 29

**Question 62. What is your MOST PREFERRED other Opioid that you prescribe?**

**Text Answer**

Type in answer.

**Question 63. What is your typical prescribed maintenance dose (per administration)?**

**Text Answer**

Type in answer.

**Question 64. What is your typical dosing frequency?**

**Radio Answer**

Select one answer.

- a.  As required (PRN)
- b.  Other
- c.  q 12 hours
- d.  q 24 hours
- e.  q 48 hours
- f.  q 72 hours

**Alternate Answer for Question 64**

If other, please specify.

Enter Text

**Question 65. What is your preferred formulation?**

**Radio Answer**

Select one answer.

- a.  Capsule
- b.  Injectable
- c.  Liquid
- d.  Transdermal

**Question 66. To what percentage of your cats with chronic musculoskeletal pain or arthritis do you prescribe this drug?**

**Radio Answer**

Select one answer.

- a.  26% to 50%
- b.  51% to 75%
- c.  76% to 99%

- d.  All cats
- e.  Less than 25%

**Question 67. What is the average prescribed duration of treatment with this drug?**

**Radio Answer**

Select one answer.

- a.  11 to 14 days
- b.  15 to 30 days
- c.  2 to 3 days
- d.  31 to 60 days
- e.  4 to 7 days
- f.  61 to 120 days
- g.  8 to 10 days
- h.  More than 120 days
- i.  ONE day

---

## Page 30

**Question 68. Do you ever prescribe amantadine (Symadine) for cats with chronic musculoskeletal pain or arthritis?**

**Radio Answer**

Select one answer.

- a.  No
- b.  Yes

---

## Page 31

### Question 69. What is your typical prescribed maintenance dose (per administration)?

#### Radio Answer

Select one answer.

- a.  3 to 5 mg/kg
- b.  Less than 3 mg/kg
- c.  More than 5 mg/kg

### Question 70. What is your typical dosing frequency?

#### Radio Answer

Select one answer.

- a.  As required (PRN)
- b.  Other
- c.  q 12 hours
- d.  q 24 hours
- e.  q 48 hours
- f.  q 72 hours

#### Alternate Answer for Question 70

If other, please specify.

Enter Text

### Question 71. What is your preferred formulation?

#### Radio Answer

Select one answer.

- a.  Capsule
- b.  Compounded
- c.  Liquid

#### Alternate Answer for Question 71

If compounded, please describe.

Enter Text

### Question 72. To what percentage of your cats with chronic musculoskeletal pain or arthritis do you prescribe this drug?

#### Radio Answer

Select one answer.

- a.  26% to 50%
- b.  51% to 75%
- c.  76% to 99%

- d.  All cats
- e.  Less than 25%

**Question 73. What is the average prescribed duration of treatment with this drug?**

**Radio Answer**

Select one answer.

- a.  11 to 14 days
- b.  15 to 30 days
- c.  2 to 3 days
- d.  31 to 60 days
- e.  4 to 7 days
- f.  61 to 120 days
- g.  8 to 10 days
- h.  More than 120 days
- i.  ONE day

---

## Page 32

**Question 74. Do you ever prescribe amitriptyline (Amitril) for cats with chronic musculoskeletal pain or arthritis?**

**Radio Answer**

Select one answer.

- a.  No
- b.  Yes

---

## Page 33

### Question 75. What is your typical prescribed maintenance dose (per administration)?

#### Radio Answer

Select one answer.

- a.  0.5 to 1 mg/kg
- b.  1 to 2.5 mg/kg
- c.  Less than 0.5 mg/kg
- d.  More than 2.5 mg/kg

### Question 76. What is your typical dosing frequency?

#### Radio Answer

Select one answer.

- a.  As required (PRN)
- b.  Other
- c.  q 12 hours
- d.  q 24 hours
- e.  q 48 hours
- f.  q 72 hours

#### Alternate Answer for Question 76

If other, please specify.

Enter Text

### Question 77. What is your preferred formulation?

#### Radio Answer

Select one answer.

- a.  Compounded
- b.  Tablet

#### Alternate Answer for Question 77

If compounded, please describe.

Enter Text

### Question 78. To what percentage of your cats with chronic musculoskeletal pain or arthritis do you prescribe this drug?

#### Radio Answer

Select one answer.

- a.  26% to 50%
- b.  51% to 75%
- c.  76% to 99%

- d.  All cats
- e.  Less than 25%

**Question 79. What is the average prescribed duration of treatment with this drug?**

**Radio Answer**

Select one answer.

- a.  11 to 14 days
- b.  15 to 30 days
- c.  2 to 3 days
- d.  31 to 60 days
- e.  4 to 7 days
- f.  61 to 120 days
- g.  8 to 10 days
- h.  More than 120 days
- i.  ONE day

---

## Page 34

**Question 80. Do you ever prescribe prednisolone for cats with chronic musculoskeletal pain or arthritis?**

**Radio Answer**

Select one answer.

- a.  No
- b.  Yes

---

## Page 35

### Question 81. What is your typical prescribed maintenance dose (per administration)?

#### Radio Answer

Select one answer.

- a.  0.5 to 1 mg/kg
- b.  1 to 2 mg/kg
- c.  Less than 0.5 mg/kg
- d.  More than 2 mg/kg

### Question 82. What is your typical dosing frequency?

#### Radio Answer

Select one answer.

- a.  As required (PRN)
- b.  Other
- c.  q 12 hours
- d.  q 24 hours
- e.  q 48 hours
- f.  q 72 hours

#### Alternate Answer for Question 82

If other, please specify.

Enter Text

### Question 83. What is your preferred formulation?

#### Radio Answer

Select one answer.

- a.  Liquid
- b.  Tablet
- c.  Compounded

#### Alternate Answer for Question 83

If compounded, please describe.

Enter Text

### Question 84. To what percentage of your cats with chronic musculoskeletal pain or arthritis do you prescribe this drug?

#### Radio Answer

Select one answer.

- a.  26% to 50%
- b.  51% to 75%

- c.  76% to 99%
- d.  All cats
- e.  Less than 25%

**Question 85. What is the average prescribed duration of treatment with this drug?**

**Radio Answer**

Select one answer.

- a.  11 to 14 days
- b.  15 to 30 days
- c.  2 to 3 days
- d.  31 to 60 days
- e.  4 to 7 days
- f.  61 to 120 days
- g.  8 to 10 days
- h.  More than 120 days
- i.  ONE day

---

## Page 36

**Question 86. Do you ever prescribe methylprednisolone acetate (Depomedrol) for cats with chronic musculoskeletal pain or arthritis?**

**Radio Answer**

Select one answer.

- a.  No
- b.  Yes

---

## Page 37

### Question 87. What is your typical prescribed maintenance dose (per administration)?

#### Radio Answer

Select one answer.

- a.  10 to 20 mg per cat
- b.  Less than 10 mg per cat
- c.  More than 20 mg per cat

### Question 88. What is your typical dosing frequency?

#### Radio Answer

Select one answer.

- a.  As required (PRN)
- b.  Every 2 months
- c.  Every 2 weeks
- d.  Monthly
- e.  Other
- f.  Weekly

#### Alternate Answer for Question 88

If other, please specify.

Enter Text

### Question 89. To what percentage of your cats with chronic musculoskeletal pain or arthritis do you prescribe this drug?

#### Radio Answer

Select one answer.

- a.  26% to 50%
- b.  51% to 75%
- c.  76% to 99%
- d.  All cats
- e.  Less than 25%

### Question 90. What is the average prescribed duration of treatment with this drug?

#### Radio Answer

Select one answer.

- a.  11 to 14 days
- b.  15 to 30 days
- c.  2 to 3 days
- d.  31 to 60 days
- e.  4 to 7 days

- f.  61 to 120 days
- g.  8 to 10 days
- h.  More than 120 days
- i.  ONE day

---

## Page 38

**Question 91. Do you ever prescribe Triamcinolone acetonide for cats with chronic musculoskeletal pain or arthritis?**

**Radio Answer**

Select one answer.

- a.  No
- b.  Yes

---

## Page 39

### Question 92. What is your typical prescribed maintenance dose (per administration)?

#### Radio Answer

Select one answer.

- a.  0.5 to 1 mg/kg
- b.  Less than 0.5 mg/kg
- c.  More than 1 mg/kg

### Question 93. What is your typical dosing frequency?

#### Radio Answer

Select one answer.

- a.  As required (PRN)
- b.  Other
- c.  q 12 hours
- d.  q 24 hours
- e.  q 48 hours
- f.  q 72 hours

#### Alternate Answer for Question 93

If other, please specify.

Enter Text

### Question 94. What is your preferred formulation?

#### Radio Answer

Select one answer.

- a.  Compounded
- b.  Tablet

#### Alternate Answer for Question 94

If compounded, please describe.

Enter Text

### Question 95. To what percentage of your cats with chronic musculoskeletal pain or arthritis do you prescribe this drug?

#### Radio Answer

Select one answer.

- a.  26% to 50%
- b.  51% to 75%
- c.  76% to 99%
- d.  All cats

e.  Less than 25%

**Question 96. What is the average prescribed duration of treatment with this drug?**

**Radio Answer**

Select one answer.

- a.  11 to 14 days
- b.  15 to 30 days
- c.  2 to 3 days
- d.  31 to 60 days
- e.  4 to 7 days
- f.  61 to 120 days
- g.  8 to 10 days
- h.  More than 120 days
- i.  ONE day

---

## Page 40

**Question 97. Do you ever prescribe other medications for cats with chronic musculoskeletal pain or arthritis?**

**Radio Answer**

Select one answer.

- a.  No
- b.  Yes

---

## Page 41

**Question 98. What is the OTHER treatment that you prescribe for chronic musculoskeletal pain in cats?**

**TextArea Answer**

Type in answer.

**Question 99. What is your typical prescribed maintenance dose (per administration)?**

**Text Answer**

Type in answer.

**Question 100. What is your typical dosing frequency?**

**Radio Answer**

Select one answer.

- a.  As required (PRN)
- b.  Other
- c.  q 12 hours
- d.  q 24 hours
- e.  q 48 hours
- f.  q 72 hours

**Alternate Answer for Question 100**

If other, please specify.

Enter Text

**Question 101. What is your preferred formulation?**

**Radio Answer**

Select one answer.

- a.  Compounded
- b.  Other
- c.  Tablet

**Alternate Answer for Question 101**

If compounded or other, please describe.

Enter Text

**Question 102. To what percentage of your cats with chronic musculoskeletal pain or arthritis do you prescribe this treatment?**

**Radio Answer**

Select one answer.

- a.  26% to 50%
- b.  51% to 75%
- c.  76% to 99%
- d.  All cats
- e.  Less than 25%

**Question 103. What is the average prescribed duration of treatment with this treatment?**

**Radio Answer**

Select one answer.

- a.  11 to 14 days
- b.  15 to 30 days
- c.  2 to 3 days
- d.  31 to 60 days
- e.  4 to 7 days
- f.  61 to 120 days
- g.  8 to 10 days
- h.  More than 120 days
- i.  ONE day

---

## Page 42

### Question 104. What is your IDEAL treatment formulation for treating chronic musculoskeletal pain or arthritis in cats?

#### Radio Answer

Select one answer.

- a.  Capsule
- b.  Liquid
- c.  Other
- d.  Parenteral (SQ or IM)
- e.  Tablet

#### Alternate Answer for Question 104

If other, please specify.

Enter Text

### Question 105. What is your IDEAL dosing frequency for medications used to treat chronic musculoskeletal pain or arthritis in cats?

#### Radio Answer

Select one answer.

- a.  Once daily
- b.  Once every other month
- c.  Once monthly
- d.  Once weekly
- e.  Thrice daily
- f.  Twice daily
- g.  Twice monthly
- h.  Twice weekly

---

## Page 43

**Question 106. What formulations for treating chronic musculoskeletal pain or arthritis in cats would you consider acceptable?**

**Checkbox Answer**

Select all that apply.

- a.  Capsule
- b.  Liquid
- c.  Other
- d.  Parenteral (SQ or IM)
- e.  Tablet

**Alternate Answer for Question 106**

If other, please specify.

Enter Text

**Question 107. What dosing frequencies for medications used to treat chronic musculoskeletal pain or arthritis in cats would you consider acceptable?**

**Checkbox Answer**

Select all that apply.

- a.  Once daily
- b.  Once every other month
- c.  Once monthly
- d.  Once weekly
- e.  Thrice daily
- f.  Twice daily
- g.  Twice monthly
- h.  Twice weekly

---

## Page 44

Question 108. Please click **FINISH** to record your responses.

You can add comments below, if you wish.

TextArea Answer

Type in answer.

---

## Conclusion

Thanks for participating. Please stay tuned to see a preview of the results. We will notify you by email when the results are ready for viewing.

---
